# Supplementary material for: Digital Diabetes Care System Observations from a Pilot Evaluation Study in Vietnam
Source: MDPI journal article supplement (doi:10.3390/ijerph17030937), 2020-02-03
Supplement: s1 [file s1]

### **Supplementary material**

1. Patient Satisfaction Questionnaire – patients answered all questions on a scale of 5-1 (extremely satisfied – extremely dissatisfied). Averages of results for all questions regarding each aspect of the system were calculated.  
Obstacles were listed as free text.
2. Physician Satisfaction Questionnaire – Per Patient - physicians answered all questions on a scale of 5-1 (extremely satisfied – extremely dissatisfied). Average of results for each question was calculated.
3. Physician Satisfaction Questionnaire – Group Assessment - physicians answered all questions on a scale of 5-1 (extremely satisfied – extremely dissatisfied). Average of results for each question was calculated.  
Obstacles were listed as free text.

### **Patient Satisfaction Questionnaire**

1. Please rate your satisfaction of using the GlucoMe glucometer for glucose test with regards to the following aspects:
  - 1) Ease of positioning the test strip in the GlucoMe glucometer
  - 2) Ease of placing the blood glucose sample on the test strip
  - 3) Duration of time to insert the strip into the glucometer and get the results on the application
  - 4) Ease of using the GlucoMe glucometer as compared to your previous device
  - 5) Duration of the entire process of sugar blood test
  
2. Please rate your impression of using the GlucoMe application on your mobile with regards to the following aspects:
  - 1) Ease of accessing the application on the mobile
  - 2) Ease of reading the information in the application
  - 3) Ease of reading your glucose results in the application
  - 4) The order that the information appears in the application
  - 5) Ease of reading your blood glucose reports in the application
  - 6) Ease of understanding the error or any other messages in the application
  - 7) Ease of understanding the reports on your glucose levels in the application
  - 8) Usefulness of the information other than the glucose values
  - 9) Ease of entering information (such as injection, carbohydrate consumption) to the application
  - 10) General impression of the application
  
3. Based on your experience using the system, please rate your impression on the GlucoMe system with regards to the following statement:
  - 1) Through the GlucoMe app, I feel better connected to my physician
  - 2) Through the GlucoMe app, I feel better monitored and taken care of
  - 3) Through the GlucoMe app, I have a better trust in the treatment decisions of my physician because it is data-driven
  - 4) I would strongly support the broad usage of the GlucoMe platform across hospitals
  
4. What is, in your opinion, the biggest obstacle to more people using GlucoMe in your country?

### **Physician Satisfaction Questionnaire – Per Patient**

Please rate your impression of using the GlucoMe application with regards to the following variables and with the impression based on the treatment with this specific patient:

- 1) Ease of accessing the application
- 2) Ease of reading the glucose levels data
- 3) Ease of reading the reports
- 4) Usefulness of the data and the reports other than the glucose values
- 5) General impression from the application

### **Physician Satisfaction Questionnaire – Group Assessment**

1. Please rate your impression on the utility / value of GlucoMe system with regards to the following statements and with the impression based on the treatment of the group of patients you have followed with the system
  - 1) GlucoMe platform helped me better organize my patients
  - 2) GlucoMe platform helped me to be more efficient and allocate more time to those patients who need a Face-to-Face consultation vs. patients who I can reach out digitally
  - 3) By using the GlucoMe platform, patients are receiving a better care because I can better organize them based on their needs, make data-driven treatment decision and intervene in real-time
  - 4) I would strongly support the broad usage of the GlucoMe platform across hospitals.
  
2. What is, in your opinion, the biggest obstacle to more people using GlucoMe in your country?
